# Supplementary material for: Human embryonic and induced pluripotent stem cells maintain phenotype but alter their metabolism after exposure to ROCK inhibitor
Source: PubMed Central journal article supplement (PMC5292706; doi:10.1038/srep42138), 2017-02-06
Supplement: srep42138-s2.pdf [file srep42138-s2.pdf]

# **Human embryonic and induced pluripotent stem cells maintain phenotype but alter their metabolism after exposure to ROCK inhibitor**

Spyros I. Vernardis<sup>1</sup>, Konstantinos Terzoudis<sup>1</sup>, Nicki Panoskaltsis<sup>1,2</sup>, Athanasios Mantalaris<sup>1</sup>

<sup>1</sup>Biological Systems Engineering Laboratory, Department of Chemical Engineering, Imperial College London, UK

<sup>2</sup>Department of Haematology, Imperial College London

## **Supplementary information**

SUPPLEMENTARY FILE: The metabolite peaks detected in the MS-reconstructed chromatogram

| PKM Name | METABOLITE    | Molecular Weight | Retention time (min) | Chemical Category | FMO | Peak ID |     |     |     |     |     |     |     |     |      |      |      |      |      |      |      |      |      |      |      |      |      |      |      |      |      |
|----------|---------------|------------------|----------------------|-------------------|-----|---------|-----|-----|-----|-----|-----|-----|-----|-----|------|------|------|------|------|------|------|------|------|------|------|------|------|------|------|------|------|
|          |               |                  |                      |                   |     | PK1     | PK2 | PK3 | PK4 | PK5 | PK6 | PK7 | PK8 | PK9 | PK10 | PK11 | PK12 | PK13 | PK14 | PK15 | PK16 | PK17 | PK18 | PK19 | PK20 | PK21 | PK22 | PK23 | PK24 | PK25 | PK26 |
| PK1      | Acetylcholine | 146              | 5.26                 | Cholinergic       | 1   | ...     | ... | ... | ... | ... | ... | ... | ... | ... | ...  | ...  | ...  | ...  | ...  | ...  | ...  | ...  | ...  | ...  | ...  | ...  | ...  | ...  |      |      |      |
| PK2      | Acetylcholine | 146              | 5.26                 | Cholinergic       | 1   | ...     | ... | ... | ... | ... | ... | ... | ... | ... | ...  | ...  | ...  | ...  | ...  | ...  | ...  | ...  | ...  | ...  | ...  | ...  | ...  | ...  |      |      |      |
| PK26     | Acetylcholine | 146              | 5.26                 | Cholinergic       | 1   | ...     | ... | ... | ... | ... | ... | ... | ... | ... | ...  | ...  | ...  | ...  | ...  | ...  | ...  | ...  | ...  | ...  | ...  | ...  | ...  | ...  |      |      |      |
| PK27     | Acetylcholine | 146              | 5.26                 | Cholinergic       | 1   | ...     | ... | ... | ... | ... | ... | ... | ... | ... | ...  | ...  | ...  | ...  | ...  | ...  | ...  | ...  | ...  | ...  | ...  | ...  | ...  | ...  |      |      |      |
| PK28     | Acetylcholine | 146              | 5.26                 | Cholinergic       | 1   | ...     | ... | ... | ... | ... | ... | ... | ... | ... | ...  | ...  | ...  | ...  | ...  | ...  | ...  | ...  | ...  | ...  | ...  | ...  | ...  | ...  |      |      |      |

Note 1: Chemical category 1, 2 and 3 as used as defined in Kurnat and Kläber, 2017. Category 10 is assigned to peaks that are considered artifacts due to column bleed-through. 10 is assigned to category 1 metabolites that form only one derivative. 10 is assigned to those detection compound (in the case listed) which a category 1 metabolite. 10 is assigned to several detection compound in the case 1-10 (2) please which a category 2 metabolite.

Note 2: A peak is defined 'PK ID', respectively, if it has been qualified at least one of the assigned metabolite profile. (PK ID) if a peak is detected in at least one of the assigned metabolite profiles for a compound (one peak due to the shape of the peak).
